# Supplementary material for: Occurrence, Distribution and Risk Assessment of Mercury in Multimedia of Soil-Dust-Plants in Shanghai, China
Source: PubMed Central journal article supplement (PMC6747141; doi:10.3390/ijerph16173028), 2019-08-21
Supplement: ijerph-16-03028-s001.pdf [file ijerph-16-03028-s001.pdf]

**Table S1.** Determination parameters of AFS 9230 atomic fluorescence photometer.

| Instrument condition   | Parameters | Instrument condition        | Parameters |
|------------------------|------------|-----------------------------|------------|
| Negative high pressure | 285 V      | Reading time                | 12 s       |
| Lamp current           | 30 mA      | Delay time                  | 0.5 s      |
| Atomizer height        | 12 mm      | Measurement method          | Std. Curve |
| Atomizer temperature   | 200 °C     | Reading method              | Peak Area  |
| Carrier gas flow rate  | 300 mL/min | Effective measurement times | 2          |
| Shielding gas flow     | 800 mL/min |                             |            |

**Table S2.** Reference dose (*RfD*) for each exposure pathways.

| Pathways                | Reference dose/ mg/(kg×day) |
|-------------------------|-----------------------------|
| Direct ingestion        | 3.00E-04                    |
| Inhalation of particles | 8.57E-05                    |
| Dermal absorption       | 2.10E-05                    |

**Table S3.** Descriptive statistics of mercury concentrations (mg/kg) in soils, dust, foliar dust and camphor tree leaves in Shanghai.

| Descriptive    | Soil   | Dust   | Foliar dust | Leaves |
|----------------|--------|--------|-------------|--------|
| Mean           | 0.361  | 0.596  | 0.259       | 0.088  |
| Medium         | 0.3364 | 0.5019 | 0.1132      | 0.0564 |
| Std. Deviation | 0.240  | 0.366  | 0.482       | 0.083  |
| CV %           | 66.4   | 61.5   | 185.8       | 93.8   |
| Minimum        | 0.078  | 0.210  | 0.024       | 0.026  |
| Maximum        | 1.362  | 2.184  | 2.260       | 0.453  |

**Table S4.** Pearson correlation coefficient (*r*) of mercury concentrations in soils, dust, foliar dust and camphor tree leaves in Shanghai. (\*: Significantly at 99.9% confidence level)

|             | Soil    | Road dust | Foliar dust | Leaves |
|-------------|---------|-----------|-------------|--------|
| Soil        | 1       |           |             |        |
| Road dust   | 0.0512  | 1         |             |        |
| Foliar dust | -0.2335 | -0.0559   | 1           |        |
| Leaves      | -0.0093 | 0.5648*   | 0.0612      | 1      |

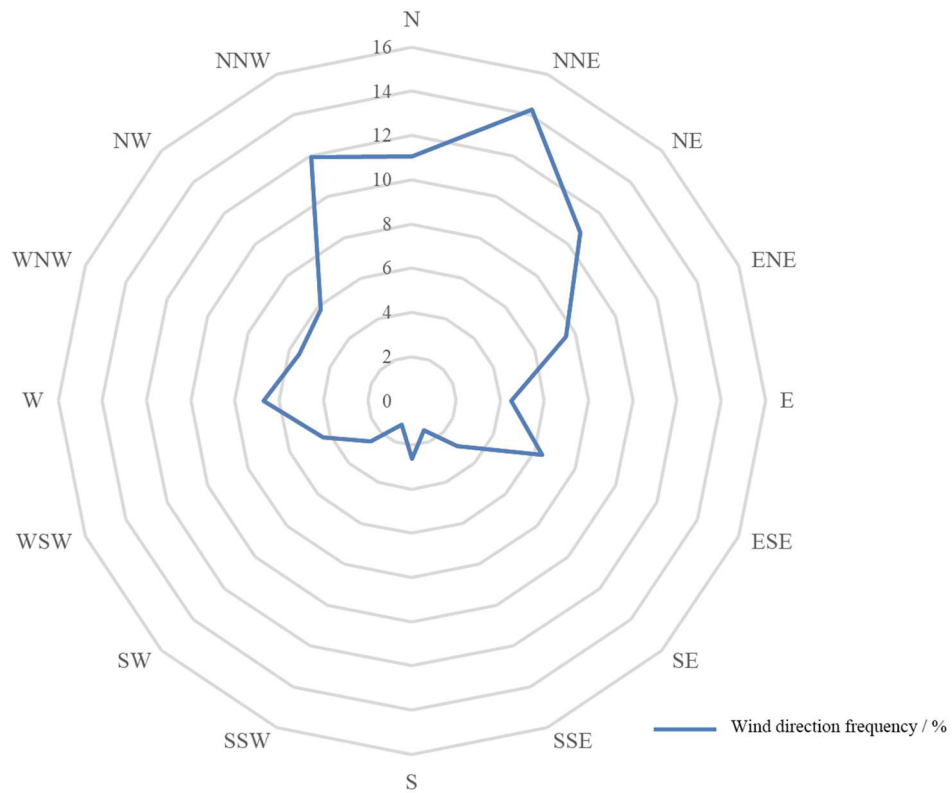

**Figure S1.** Shanghai winter (December - February) wind rose. The meteorological data are derived from the measured meteorological data of Shanghai from 1971 to 2003 [1].

**References**

1. Meteorological Information Center of China Meteorological Administration. Special data set for China's building thermal environment analysis. *China Building Industry Press* 2005. (in Chinese)
